1 ***Aedes aegypti* and *Aedes albopictus* abundance, landscape coverage**  
2 **and spectral indices effects in a subtropical city of Argentina.**

3 Mía Elisa Martín<sup>a,b</sup>, Ana Carolina Alonso<sup>b,c</sup>, Janinna Faraone<sup>b,c</sup>, Marina Stein<sup>b,c</sup>, Elizabet  
4 Lilia Estallo<sup>a,b</sup>

5 <sup>a</sup>Instituto de Investigaciones Biológicas y Tecnológicas, Universidad Nacional de  
6 Córdoba. Av. Vélez Sarsfield 1611, CP X5016GCA. Córdoba, Córdoba, Argentina.

7 <sup>b</sup>Consejo Nacional de Investigaciones Científicas y Técnicas, Argentina.

8 <sup>c</sup>Instituto de Medicina Regional, Universidad Nacional del Nordeste. Avda. Las Heras  
9 727, CP 3500. Resistencia, Chaco, Argentina.

10

11

12

13

14

15

16 Running head: Landscape coverage associated with *Aedes aegypti* and *Aedes*  
17 *albopictus*.

## 18 **Abstract**

19 The presence, abundance and distribution of *Aedes (Stegomyia) aegypti* (Linnaeus  
20 1762) and *Aedes (Stegomyia) albopictus* (Skuse 1894) could be conditioned by different  
21 data obtained from satellite remote sensors. In this paper, we aim to estimate the effect  
22 of landscape coverage and spectral indices on the abundance of *Ae. aegypti* and *Ae.*  
23 *albopictus* from the use of satellite remote sensors in Eldorado, Misiones, Argentina.  
24 Larvae of *Aedes aegypti* and *Ae. albopictus* were collected monthly from June 2016 to  
25 April 2018, in four outdoor environments: tire repair shops, cemeteries, family  
26 dwellings, and an urban natural park. The proportion of each land cover class was  
27 determined by Sentinel-2 image classification. Furthermore spectral indices were  
28 calculated. Generalized Linear Mixed Models were developed to analyze the possible  
29 effects of landscape coverage and vegetation indices on the abundance of mosquitoes.  
30 The model's results showed the abundance of *Ae. aegypti* was better modeled by the  
31 minimum values of the NDVI index, the maximum values of the NDBI index and the  
32 interaction between both variables. In contrast, the abundance of *Ae. albopictus* has to  
33 be better explained by the model that includes the variables bare soil, low vegetation  
34 and the interaction between both variables.

35

36 Corresponding author: Mía Elisa Martín; [mia.elisamartin@mi.unc.edu.ar](mailto:mia.elisamartin@mi.unc.edu.ar)

37 Key words: landscape; *Aedes aegypti*; *Aedes albopictus*; public health; urban ecology;  
38 urban environment; dengue; Eldorado city.

39

## 40 Introduction

41 In the world, the most important mosquito species in terms of disease transmission to  
42 humans are: *Aedes (Stegomyia) aegypti* (Linnaeus 1762) and *Aedes (Stegomyia)*  
43 *albopictus* (Skuse 1894). The arboviruses transmitted by these mosquitoes cause some  
44 of the most important diseases in the world (dengue, yellow fever, Zika, chikungunya  
45 and others), representing one of the greatest concerns for public health due to the great  
46 global interconnection mainly due to human population migrations, tourism, the growth  
47 of the transport of food and products, environmental changes related to urbanization,  
48 deforestation and climate change, among others (Juliano & Lounibos, 2005; Rúa-Uribe  
49 *et al.*, 2012). These mosquito species are present in urban, suburban, and rural  
50 settlements in tropical, subtropical and temperate regions due to their ability to inhabit  
51 both natural (e.g., tree holes) and artificial (e.g., manholes, water storage containers,  
52 flower pots, used tires) breeding sites (Hawley, 1998; Vezzani & Carbajo, 2008). In  
53 particular, the distribution of *Ae. aegypti* include tropical, subtropical and temperate  
54 regions of the world, where it is considered an anthropophilic mosquito and is present  
55 mainly inside homes in urban areas. *Aedes albopictus* is distributed in the tropics  
56 worldwide, but also in temperate regions in the northern hemisphere, and is associated  
57 with the peri-domicile of suburban and rural environments (Lima-Camara *et al.*, 2006,  
58 Robert *et al.*, 2020).

59 In Argentina, since the first record in the country during the first half of the 20th  
60 century, *Ae. aegypti* was present in several provinces of the country. Currently, it is  
61 present in 19 provinces: Buenos Aires, Catamarca, Chaco, Córdoba, Corrientes, Entre  
62 Ríos, Formosa, Jujuy, La Pampa, La Rioja, Mendoza, Misiones, Neuquén, Salta, San  
63 Juan, San Luis, Santa Fe, Santiago del Estero and Tucumán (Grech *et al.*, 2012; Rossi,  
64 2015; Páez *et al.*, 2016). The first record of *Ae. albopictus* in Argentina dates from 1998

65 when it was found in the cities of San Antonio and Eldorado in Misiones province  
66 (Rossi *et al.*, 1999; Schweigmann *et al.*, 2004). For 20 years, it had only been detected  
67 in three other cities in Misiones (Puerto Iguazú, Comandante Andresito, and Colonia  
68 Aurora) (Vezzani & Carbajo, 2008; Lizuain *et al.*, 2019). At present, it has been found  
69 for the first time in Corrientes province in 2019, 200 km to the south from its previous  
70 records, representing the southernmost distribution in South America (Goenaga *et al.*,  
71 2020).

72 The presence, abundance and distribution of *Ae. aegypti* and *Ae. albopictus* could be  
73 conditioned by the landscape coverage from the differences presented in the biology,  
74 ecology and development of these vectors (Mudele & Gamba, 2019; Mudele *et al.*,  
75 2021). Changes in environmental conditions as a result of urbanization have been  
76 related (directly or indirectly) to the availability of breeding sites, and the modification  
77 in the abundance, richness, development and survival of adult mosquitoes (Baldacchino  
78 *et al.*, 2017; Benitez *et al.*, 2020). Different data obtained from satellite remote sensors  
79 have been used to indicate and identify favorable breeding sites for mosquitoes (Hassan  
80 *et al.*, 2013). Some studies have linked mosquito populations to remotely detected land  
81 cover features. Vanwambeke *et al.* (2007) found a high probability of finding larvae of  
82 *Ae. albopictus* in the peri-urban. It has also been related to the presence of mixed areas  
83 of urbanization and vegetation (Manica *et al.*, 2016). While the abundance and  
84 distribution of *Ae. aegypti* has been related to a greater extent, with variables related to  
85 urbanization, such as the presence of buildings (Sallam *et al.*, 2017; Benitez *et al.*,  
86 2019).

87 On the other hand, vegetation is one of the most important and frequently described  
88 environmental characteristics in the spatial analysis of these species, being repeatedly  
89 used in research based on the calculation of satellite spectral indices (Heinisch *et al.*,

90 2019). Numerous indices can be obtained from algorithms applied on the original  
91 remote sensor bands, two of these are potentially indicative of the presence of mosquito  
92 breeding sites due to the dependence of the immature stages on the aquatic habitat  
93 (Vanwambeke *et al.*, 2007). The Normalized Difference Vegetation Index (NDVI) is the  
94 spectral vegetation index most used in spatial and temporal studies (Estallo *et al.*, 2018;  
95 Benitez *et al.*, 2019). Along with this, the Normalized Difference Water Index (NDWI)  
96 have been widely used in mosquito studies for many years (Pope *et al.*, 1994; Mudele &  
97 Gamba, 2019), as well as applied in the study of vector-borne diseases (Estallo *et al.*,  
98 2012).

99 For Argentina, although the knowledge about the biology of *Ae. aegypti* is well  
100 documented (Carbajo *et al.*, 2006; Estallo *et al.*, 2018; Benitez *et al.*, 2019), there is  
101 very little work on *Ae. albopictus* since its detection in 1998 (Schweigmann *et al.*, 2004;  
102 Lizuain *et al.*, 2019; Faraone *et al.*, 2021). In this context and due to the absence of  
103 vaccines for most of the viruses transmitted by these two species, vector management  
104 and control is the main current tool to prevent their spread. Therefore, the aim of this  
105 study was to estimate the effect of landscape coverage and spectral indices on the  
106 abundance of *Ae. aegypti* and *Ae. albopictus* from the use of satellite remote sensors in  
107 Eldorado, Misiones, Argentina.

## 108 **Materials and Methods**

### 109 **Study site**

110 Eldorado city (Fig. 1) is located in the northwest of Misiones province, within the  
111 Neotropical region (26° 24' S, 54° 38' W). The phytogeographical region is Paraná  
112 province. The area characterized by the presence of three arboreal strata, with lianas,  
113 epiphytes and hemiepiphytes and an undergrowth of ferns and herbaceous and shrubby

114 phanerophytes, including bamboos (Oyarzabal *et al.*, 2018). The climate is subtropical,  
115 hot and humid, without a marked dry season. The mean annual temperature is 22 °C,  
116 with a maximum temperature of 38.5 °C (January) and a minimum of 5.4 °C (July); the  
117 mean annual rainfall is 2020 mm (Silva *et al.*, 2008).

118 Eldorado is the third-largest city in the province with a population of 100,000  
119 inhabitants and a surface of 215 km<sup>2</sup> where 14% corresponds to rural areas, 30.6% to  
120 natural forests and 55.4% to other uses (Molinatti *et al.*, 2010). The city expands on  
121 both sides along the National Route N° 12. The main economic activities of the region  
122 are forestry (sawmills, pulp and paper industry) and agriculture, oriented to industrial  
123 crops production of (yerba mate, tea, tobacco and citrus).

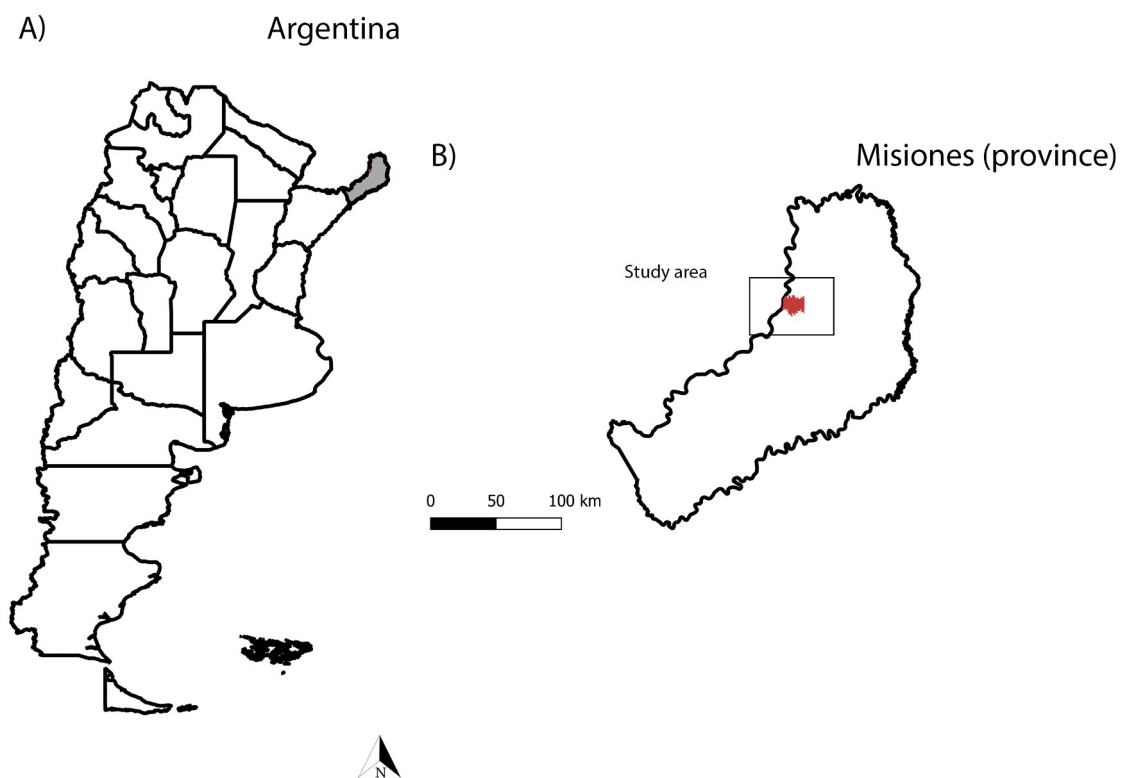

124 Fig. 1. (A and B) Geographic location of the study area in Misiones, Argentina.

## 125 Entomological sampling

126 Larvae of *Aedes aegypti* and *Ae. albopictus* were collected monthly from June 2016 to  
127 April 2018, in four outdoor environments: tire repair shops, cemeteries, family  
128 dwellings, and an urban natural park (Parque Schwelm) (Fig. 2). Sampling sites with  
129 larval presence of both species were georeferenced using the Global Position System  
130 (GPS-Garmin eTREX 10). The number of monthly samples was N = 60, distributed as  
131 follows: 20 natural habitats; 20 artificial habitats of cemeteries, 10 of repair shops and  
132 10 of houses. The homes were visited according to the provisions of the Environmental  
133 Sanitation Direction of the Municipality of Eldorado, where each month different  
134 neighborhoods were visited. The larvae were transferred to the laboratory of the  
135 Institute of Regional Medicine for their breeding (larvae of instar I, II and III),  
136 conservation and determination. For morphological identification of the specimens  
137 (fourth instar larvae), dichotomous keys (Darsie 1985; Consoli & de Oliveira 1994)  
138 were used.

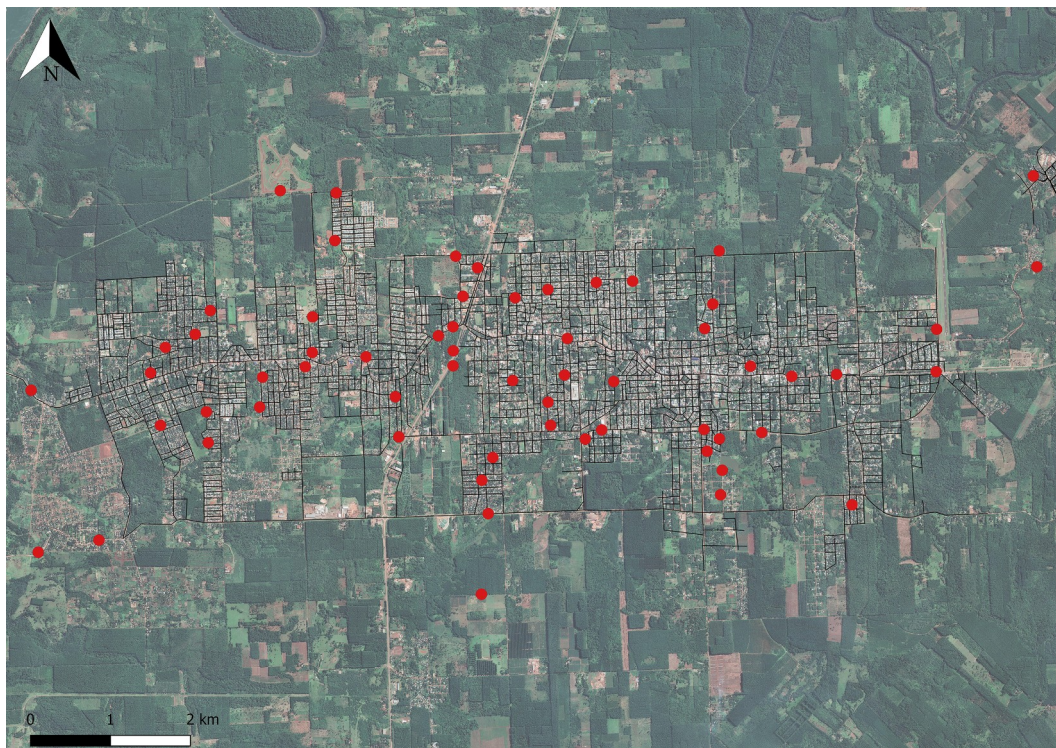

146 **Fig. 2. Distribution of sampling sites in Eldorado, Misiones, Argentina.**

147 **Remote sensing data**

148 In order to estimate the different landscape coverage in the city, images from the  
149 Sentinel-2 satellite were used. Five images from the satellite were used, which were  
150 downloaded from the Land Viewer website (<https://eos.com/landviewer/>). The satellite  
151 images correspond to the succession of stations from the three years of sampling and  
152 were selected according to the availability of images on the website and the absence of  
153 clouds over the area of interest.

#### 154 *Spectral indices*

155 On each satellite image, spectral indices were calculated: Normalized Difference  
156 Vegetation Index (NDVI), Normalized Difference Water Index (NDWI) and  
157 Normalized Difference Built-up Index (NDBI). The NDVI reflects the contrast of  
158 vegetation reflectivity between the spectral regions of Red (R) and Near Infrared (NIR)  
159 reflectance (Eq.1). This index can be associated with the vegetation cover, in terms of  
160 abundance and vigor, since it is strongly related to the photosynthetic activity of the  
161 vegetation, allowing to identify the presence of vegetation on the surface and  
162 characterize its spatial distribution. The values vary from -1 to +1, where high values  
163 correspond to areas with vigorous vegetation, negative values are associated with covers  
164 such as water and values close to zero correspond to bare soil (Chuvieco Salinero,  
165 2008). On the other hand, the NDWI is an index that takes into account the water  
166 content present in the mesophyll of the leaves and indirectly measures precipitation and  
167 soil humidity (Estallo *et al.*, 2012). It varies between -1 and +1, depending on the water  
168 content of the leaves, but also on the type of vegetation and cover. It is based on the  
169 contrast between the reflectances of Short-wave Infrared (SWIR) and NIR wavelengths  
170 (Eq.2) (Gao 1996). The NDBI is an index that highlights urban areas, where there is  
171 typically a higher reflectance in the SWIR region, compared to the NIR region (Zha *et*



172 *al.*, 2003). Positive NDBI values indicate built-up areas and those close to 0 indicate  
173 vegetation, while negative values represent bodies of water (Ranagalage *et al.*, 2017).

$$174 \quad NDVI = (NIR-R) / (NIR+R) \quad (Eq.1)$$

$$175 \quad NDWI = (NIR-SWIR) / (NIR+SWIR) \quad (Eq.2)$$

$$176 \quad NDBI = (SWIR-NIR) / (SWIR+NIR) \quad (Eq.3)$$

### 177 *Land cover classification*

178 To determine landscape coverage in Eldorado, supervised classification (Minimum  
179 Distance to Mean) was performed using QGIS 3.4.15 software (<https://www.qgis.org/>).  
180 Five land cover classes were obtained: water (rivers, lakes, artificial bodies of water),  
181 bare soil (soil without any vegetation cover, unpaved streets), urban areas (buildings,  
182 paved streets and roads), low vegetation (herbs and grasses) and high vegetation (trees  
183 and shrubs). The accuracy of the classification was measured by a confusion matrix and  
184 the value of the Kappa's coefficient, where values close to 1 indicate greater accuracy of  
185 the classification method. The areas for verification were determined from the  
186 visualization of images published in Google Earth ©. A total of 100 control points were  
187 defined by landscape coverage following the criteria recommended by Chuvieco  
188 Salinero (2008). Regarding the classification of Sentinel-2 images, the global precision  
189 of the classifications ranged from 91% to 99.6%, with Kappa's coefficients from 0.887  
190 to 0.995. One of the final classified images can be seen in Figure 3.

191

192

193

194

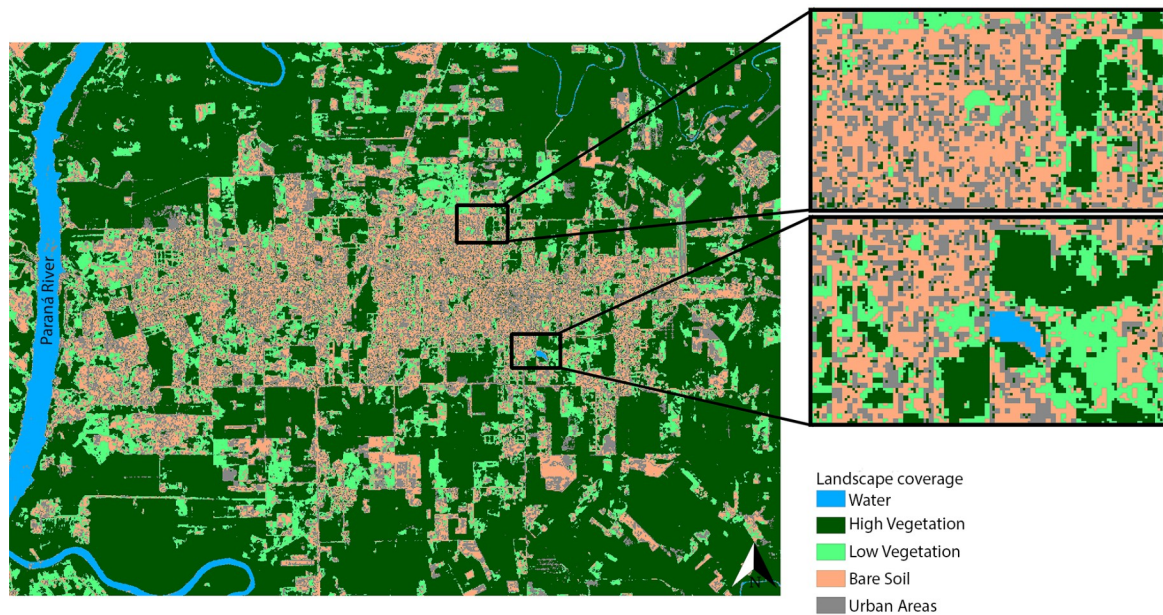

195 **Fig. 3. Supervised classified image for Eldorado from November 12, 2016.**

196 *Buffer areas*

197 Around each sampling site, circular influence areas of 100m were generated, avoiding  
198 the overlapping of the areas and taking into account the biology of the vector. Once  
199 these areas were constituted in each classified image, the proportions of each class of  
200 landscape coverage were extracted, as well as the mean, minimum and maximum values  
201 of NDVI, NDWI and NDBI.

202 *Data analysis*

203 To analyze the possible effects of landscape coverage and vegetation indices on the  
204 abundance of larvae, generalized linear mixed models (GLMM) were constructed for  
205 each species separately with a Negative Binomial distribution. To control for over-  
206 scattering, a logarithmic link function was used (Zuur *et al.*, 2009). In our analyzes, the  
207 response variable used was the number of larvae collected at each site per month. The  
208 sites were incorporated as a random effect to include spatial dependence. The

209 explanatory variables used are shown in Table 1. Water coverage was not incorporated  
210 into the models because it was not found in any buffer area.

211 **Table 1. Explanatory variables used to explain the variation in the abundances of *Ae. aegypti* and *Ae.*  
212 *albopictus* in Eldorado, Misiones.**

| Variable | Description                                                                                |
|----------|--------------------------------------------------------------------------------------------|
| highV    | Proportion of high vegetation cover extracted from a 100m buffer around each sampling site |
| lowV     | Proportion of low vegetation cover extracted from a 100m buffer around each sampling site  |
| soil     | Proportion of bare soil cover extracted from a 100m buffer around each sampling site       |
| urban    | Proportion of urban areas cover extracted from a 100m buffer around each sampling site     |
| ndvi     | Mean value of NDVI extracted from a 100m buffer around each sampling site                  |
| ndvimin  | Minimum value of NDVI extracted from a 100m buffer around each sampling site               |
| ndvimax  | Maximum value of NDVI extracted from a 100m buffer around each sampling site               |
| ndwi     | Mean value of NDWI extracted from a 100m buffer around each sampling site                  |
| ndwimin  | Minimum value of NDWI extracted from a 100m buffer around each sampling site               |
| ndwimax  | Maximum value of NDWI extracted from a 100m buffer around each sampling site               |
| ndbi     | Mean value of NDBI extracted from a 100m buffer around each sampling site                  |
| ndbimin  | Minimum value of NDBI extracted from a 100m buffer around each sampling site               |
| ndbimax  | Maximum value of NDBI extracted from a 100m buffer around each sampling site               |

213

214 First, data exploration was implemented following the protocol described in Zuur *et al.*  
215 (2010). The explanatory variables were standardized to balance their weight and also to  
216 avoid introducing errors in the model produced by the different measurement units of

217 each variable. Then, a Spearman's test was performed to analyze the correlation of the  
218 explanatory variables.

219 The models were built using a manual step-by-step forward procedure. We began by  
220 evaluating the significance of each response variable from univariate GLMM. The  
221 variables that were significant for each species were in turn used as starting points in the  
222 different branches of the modeling. Subsequent variables were added one at a time as  
223 long as they did not have a correlation coefficient  $>0.7$  with some variables already  
224 included. Interactions between them were also tested. In each step, the significance of  
225 each addition was evaluated with a significant reduction (2 points) in the Akaike  
226 Information Criterion corrected for low sample sizes (AICc) (Zuur *et al.*, 2009). The  
227 GLMMs were classified according to the AICc and the model with the lowest value was  
228 selected as the best model. The multicollinearity between variables was evaluated in the  
229 final models using the Variance Inflation Factor, considering a threshold value equal to  
230 5. Finally, the ggResidpanel package was used to verify the normality of the residual  
231 distribution and evaluate the residual plot.

232 The free software R, version 4.0.3 (<https://www.r-project.org/>) and the packages lme4  
233 (*glmer.nb* function), MuMin (*model.sel* function) and car (*vif* function) were used to  
234 perform the statistical analyzes.

## 235 **Results**

236 A total of 23,658 mosquitoes of the species under study were collected during the entire  
237 sampling period. Of that total, *Ae. aegypti* presented a relative abundance of 86.70% (n  
238 = 20,511), while *Ae. albopictus* of 13.30% (n = 3147).

239 Based on the exploratory analysis of the variables and considering those with statistical  
240 significance in the univariate GLMMs, 5 model branches were constructed for *Ae.*

241 *aegypti* and 1 branch for *Ae. albopictus*. For the first species, the univariate GLMMs of:  
242 highV, soil, ndvimin, ndbi and ndbimax were started, and after considering the  
243 correlations between the independent variables, 66 models were made that evaluated the  
244 addition of more variables and interactions. In contrast, for *Ae. albopictus* GLMMs  
245 were modeled from the variable: soil, making 14 models (see Tables A-G in Supporting  
246 Information). In Table 2, the selected models within each branch are displayed from the  
247 comparison of the goodness of fit indicators (AICc) for the species under study.

248 **Table 2. GLMM selected for *Ae. aegypti* and *Ae. albopictus*.**

| Specie                | Model | Variable        | AICc          |
|-----------------------|-------|-----------------|---------------|
| <i>Ae. aegypti</i>    | Ma3   | highV+ndvimin   | 7683.7        |
|                       | Ms11  | soil*ndvimin    | 7643.2        |
|                       | Mv16  | ndvimin*ndbimax | <b>7633.7</b> |
|                       | Mb5   | ndbi*ndvimin    | 7648.1        |
|                       | Mm16  | ndbimax*ndvimin | <b>7633.7</b> |
| <i>Ae. albopictus</i> | Ms11  | soil*lowV       | <b>3440.9</b> |

249

250 The GLMM results showed that the larvae abundance of *Ae. aegypti* was better modeled  
251 by the minimum values of the NDVI index, the maximum values of the NDBI index  
252 and the interaction between both variables (Table 3). In contrast, the abundance of *Ae.*  
253 *albopictus* has to be better explained by the model that includes the variables soil, lowV  
254 and the interaction between both variables (Table 4). The other GLMM with the same  
255 AICc (soil\*ndbimax) was not selected for presenting a vif >5 in the interaction between  
256 the variables.

257

258

259

260 **Table 3. Coefficients of the final GLMM selected for *Ae. aegypti*.**

| Variable        | Estimate  | Std. Error | Z value | Pr(> z ) |
|-----------------|-----------|------------|---------|----------|
| Intercept       | 5.18544   | 0.01475    | 351.6   | <2e-16** |
| ndvimin         | -14.48629 | 0.01481    | -977.8  | <2e-16** |
| ndbimax         | -6.94077  | 0.01481    | -468.6  | <2e-16** |
| ndvimin*ndbimax | 17.40568  | 0.01482    | 1174.7  | <2e-16** |

261 An asterisk means  $p < 0.05$ , two asterisks mean  $p < 0.01$ .

262

263 **Table 4. Coefficients of the final GLMM selected for *Ae. albopictus*.**

| Variable  | Estimate | Std. Error | Z value | Pr(> z ) |
|-----------|----------|------------|---------|----------|
| Intercept | 0.2294   | 0.5501     | 0.417   | 0.6766   |
| soil      | 0.3630   | 1.1394     | 0.319   | 0.7500   |
| lowV      | -2.9152  | 1.3444     | -2.168  | 0.0301*  |
| soil*lowV | 10.5393  | 4.4811     | 2.352   | 0.0187*  |

264 An asterisk means  $p < 0.05$ , two asterisks mean  $p < 0.01$ .

## 265 **Discussion**

266 The present study allowed us to identify the effect of landscape covers and vegetation  
267 indices on the spatio-temporal larvae abundance of *Ae. aegypti* and *Ae. albopictus* from  
268 the use of Sentinel-2 images in a subtropical city of Misiones, Argentina.

269 The global distribution of ecological rivals, *Ae. aegypti* and *Ae. albopictus*, have  
270 changed in recent decades due to differences in their abilities to compete with each  
271 other (Bennett *et al.*, 2021). Generally, *Ae. aegypti* is highly adapted to the domestic  
272 environment, and therefore abundance is positively correlated with increasing  
273 urbanization (Higa, 2011). In this study, a negative association was found between the  
274 abundance of *Ae. aegypti* and NDVI minimum values and NDBI maximum values. In

275 accordance with Bennett *et al.*, (2021) who found a negative association with lower  
276 NDVI values for both species in Panamá.

277 Urban areas provide this mosquito with food, shelter, reproduction and oviposition sites  
278 (Flaibani *et al.*, 2020). Previous studies in the United States, Costa Rica, Puerto Rico,  
279 Brazil and Argentina, have related the abundance of the species with urban areas,  
280 buildings and high housing density (Carbajo *et al.*, 2006; Vezzani & Carbajo, 2008;  
281 Fuller *et al.*, 2010; Little *et al.*, 2011; Montagner *et al.*, 2018; Benitez *et al.*, 2019,  
282 Heinisch *et al.*, 2019). In turn, Chaves *et al.*, (2021) in Costa Rica found a negative  
283 association between vegetation index (measured through the Enhanced Vegetation  
284 Index-EVI-) and the abundance of *Ae. aegypti*, while Samson *et al.*, (2015) found that  
285 urban areas identified by Urban Index were found to be important in predicting  
286 distribution of the species and that the results of their models show a high probability  
287 for *Ae. aegypti* in and around urban areas. In accordance with our findings about the  
288 negative association of *Ae. aegypti* with the maximum values of NDBI, a spatial study  
289 carried out in Buenos Aires city, Argentina found that the proliferation of mosquitoes  
290 *Ae. aegypti* was highest in medium urbanization levels (not densely built on the  
291 suburban areas) (Carbajo *et al.*, 2006). Due to the different population densities of both  
292 cities, we expect that the maximum values of NDBI in Eldorado (57,323 inhabitants)  
293 will be related to the mean values of NDBI in Buenos Aires (12,801,364 inhabitants). In  
294 cities with a high degree of urbanization and high population density, the peripheral area  
295 is the most conducive to the reproductive activity of the vector since urbanized areas of  
296 the city offer few spaces with vegetation (for food and shelter), few breeding sites and  
297 reduce the connectivity between patches of habitat that are more favorable (Carbajo *et*  
298 *al.*, 2006, Benitez *et al.*, 2019)

299 Our study found a positive association between the abundance of *Ae. aegypti* and the  
300 interaction between both indices in accordance with previous studies for Costa Rica  
301 (Troyo *et al.*, 2009) and temperate Argentina area (Benitez *et al.*, 2019) where  
302 moderately built-up residential areas with moderate tree cover likely contain a relatively  
303 high number of positive habitats for this species, therefore heterogeneity in urban areas  
304 can be linked to the distribution of this species.

305 On the other hand, the distribution of *Ae. albopictus* is associated with vegetation in  
306 rural, suburban and urban areas and its abundance is negatively affected by  
307 urbanization. This difference in distribution along the urban-rural gradient is associated  
308 with behavior related to blood feeding, host preference, and preference for vegetation,  
309 offering ideal conditions for resting and egg laying (Heinisch *et al.*, 2019; Higa, 2011;  
310 Manica *et al.*, 2016). We observed a negative association between the abundance of the  
311 species and low vegetation coverage, and a positive association between the interaction  
312 of soil and low vegetation. In this work, the land cover class soil has been related  
313 around the sampling sites with sandy streets (unpaved road) more characteristic of  
314 suburban areas (see Fig. A-C in Supporting Information). Our results are according to  
315 Myer *et al.* (2019), who found an important relationship between the abundance of *Ae.*  
316 *albopictus* and grass cover (negative) and the interaction between impervious and grass  
317 cover (positive).

318 In agreement with Rey *et al.* (2006), Honorio *et al.* (2009) and Cianci *et al.* (2015) low  
319 vegetation coverage that includes grasses was negatively associated with the abundance  
320 of *Ae. albopictus* larvae, indicating that open areas are less attractive for this mosquito  
321 species. In Porto Alegre, Brazil, *Ae. albopictus* was dominant in urban areas with  
322 vegetation, relating its adaptation to transition zones between urban and  
323 non-urban/natural habitats (Montagner *et al.*, 2018). According to Forattini (2002), the



324 adaptation of the species to transition zones results from being able to use larval habitats  
325 or breeding sites and sources of blood food from both environments. Likewise, in  
326 Florida, United States, Rey *et al.* (2006) found a positive relationship between the  
327 abundance of immature *Ae. albopictus* and land covers: ground vegetation, unpaved  
328 road and bare ground.

329 This is the first work carried out in the country to relate the abundance of *Ae. albopictus*  
330 with products derived from remote sensors, and the results obtained provide important  
331 knowledge about the biology of this species in Argentina. The Pan American Health  
332 Organization (PAHO, 2016) has recommended the following in areas of recent  
333 infestation by *Ae. albopictus* the immediate responsibility to contain and control it if  
334 possible, to prevent further spread. For this, knowledge is required on numerous aspects  
335 of the ecology of the species, areas of distribution, periods of greater activity, among  
336 others that generate baselines to understand the dynamics of pathogen transmission and  
337 therefore implement effective programs of control.

### 338 **Financial support**

339 This study was supported by the Fondo Nacional de Ciencia y Tecnología (FONCYT)  
340 [PICT 2338/14; 2403/18] IDB loan, PI L002/14–18 Secretaría General de Ciencia y  
341 Técnica (UNNE).

### 342 **Acknowledgements**

343 We thank Mr. Carlos Paredes and the technicians from the Environmental Sanitation  
344 Direction of the Municipality of Eldorado for their technical support in collecting  
345 specimens.

346

## 347 **Author Contributions**

348 Mia E. Martin: Formal analysis, Writing - original draft, Writing - review & editing.

349 Ana C. Alonso: Investigation, Methodology, Writing - original draft, Writing - review

350 & editing. Janinna Faraone: Investigation, Methodology, Writing - original draft,

351 Writing - review & editing. Marina Stein: Conceptualization, Funding acquisition,

352 Methodology, Investigation, Resources, Supervision, Writing - original draft, Writing -

353 review & editing. Elizabet L. Estallo: Formal analysis, Methodology, Writing - original

354 draft, Writing - review & editing.

## 355 **References**

356 1. Baldacchino, F., Marcantonio, M., Manica, M., Marini, G., Zorer, R., Delucchi,

357 L., Arnoldi, D., Montarsi, F., Capelli, G., Rizzoli, A., & Rosà, R. (2017).

358 Mapping of *Aedes albopictus* abundance at a local scale in Italy. *Remote*

359 *Sensing*, 9(7), 1–14. <https://doi.org/10.3390/rs9070749>

360 2. Benitez, E. M., Ludueña-Almeida, F., Frías-Céspedes, M., Almirón, W. R., &

361 Estallo, E. L. (2019). Could land cover influence *Aedes aegypti* mosquito

362 populations? *Medical and Veterinary Entomology*, 34(2), 138–144.

363 <https://doi.org/10.1111/mve.12422>

364 3. Bennett, K.L., McMillan, W.O., Enríquez, V., Barraza, E., Díaz, M., Baca, B.,

365 Whiteman, A., Cerro Medina, J., Ducasa, M., Gómez Martínez, C., Almanza, A.,

366 Rovira, J. R., & Loaiza, J. R. (2021). The role of heterogeneous environmental

367 conditions in shaping the spatiotemporal distribution of competing *Aedes*

368 mosquitoes in Panama: implications for the landscape of arboviral disease

369 transmission. *Biological Invasions*, 23, 1933–1948.

370 <https://doi.org/10.1007/s10530-021-02482-y>

371 4. Carbajo, A. E., Curto, S. I., & Schweigmann, N. J. (2006). Spatial distribution

372 pattern of oviposition in the mosquito *Aedes aegypti* in relation to urbanization

373 in Buenos Aires: southern fringe bionomics of an introduced vector. *Medical*

374 *and Veterinary Entomology*, 20(2), 209–218. [https://doi.org/10.1111/j.1365-](https://doi.org/10.1111/j.1365-2915.2006.00625.x)

375 [2915.2006.00625.x](https://doi.org/10.1111/j.1365-2915.2006.00625.x)

- 376 5. Chuvieco Salinero, E. (2008). Teledetección ambiental. Ariel Ciencia; 3rd ed.  
377 Barcelona, España. 594pp. ISBN 8434480778, 9788434480773.
- 378 6. Consoli, R. A., & Lourenço-De-Oliveira, R (1994). Principais mosquitos de  
379 importância sanitária no Brasil. Fiocruz, Ed., Cadernos de Saúde Pública (Vol.  
380 11). Rio de Janeiro. <https://doi.org/10.1590/s0102-311x1995000100027>
- 381 7. Darsie, Jr. R.F. (1985). The mosquitoes of Argentina. Part I. Keys for  
382 identification of adult females and fourth stage larvae in English and Spanish  
383 (Diptera: Culicidae). *Mosquito Systematics*, 17, 153–253.
- 384 8. Du, Y., Zhang, Y., Ling, F., Wang, Q., Li, W., & Li, X. (2016). Water bodies'  
385 mapping from Sentinel-2 imagery with Modified Normalized Difference Water  
386 Index at 10-m spatial resolution produced by sharpening the swir band. *Remote  
387 Sensing*, 8(4). <https://doi.org/10.3390/rs8040354>
- 388 9. Estallo, E. L., Sangermano, F., Grech, M., Ludueña-Almeida, F., Frías-  
389 Cespedes, M., Ainete, M., Almirón, W., & Livdahl, T. (2018). Modelling the  
390 distribution of the vector *Aedes aegypti* in a central Argentine city. *Medical and  
391 Veterinary Entomology*, 32(4), 451–461. <https://doi.org/10.1111/mve.12323>
- 392 10. Estallo, E. L., Ludueña-Almeida, F. F., Visintin, A. M., Scavuzzo, C. M.,  
393 Lamfri, M. A., Introini, M. V., Zaidenberg, M., & Almirón, W. R. (2012).  
394 Effectiveness of normalized difference water index in modelling *Aedes aegypti*  
395 house index. *International Journal of Remote Sensing*, 33(13), 4254–4265.  
396 <https://doi.org/10.1080/01431161.2011.640962>
- 397 11. Faraone, J., Fischer, S., Aponte, C. A., Etchepare, E., Stechina, O. S., & Stein,  
398 M. (2021). Hatching pattern and coexistence of *Aedes aegypti* and *Aedes*  
399 *albopictus* (Culicidae) in a subtropical city, Argentina, after three decades of  
400 coexistence. *Acta Tropica*. 218:105885. doi: 10.1016/j.actatropica.2021.105885.
- 401 12. Flaibani, N., Pérez, A. A., Barbero, I. M., & Burrioni, N. E. (2020). Different  
402 approaches to characterize artificial breeding sites of *Aedes aegypti* using  
403 generalized linear mixed models. *Infectious Diseases of Poverty*, 9(1), 1–11.  
404 <https://doi.org/10.1186/s40249-020-00705-3>
- 405 13. Fuller, D. O., Troyo, A., Calderón-Arguedas, O., & Beier, J. C. (2010). Dengue  
406 vector (*Aedes aegypti*) larval habitats in an urban environment of Costa Rica  
407 analysed with ASTER and QuickBird imagery. *International Journal of Remote  
408 Sensing*, 31(1), 3–11. <https://doi.org/10.1080/01431160902865756>
- 409 14. Goenaga, S., Chuchuy, A., Micieli, M. V., Natalini, B., Kuruc, J., &

- 410 Kowalewski, M. (2020). Expansion of the Distribution of *Aedes albopictus*  
411 (Diptera: Culicidae): New Records in Northern Argentina and Their  
412 Implications From an Epidemiological Perspective. *Journal of Medical*  
413 *Entomology*, 57(4), 1310–1313. <https://doi.org/10.1093/jme/tjaa009>
- 414 15. Grech, M., Visintin, A., Laurito, M., Estallo, E., Lorenzo, P., Rocchia, I., Korin,  
415 M., Goya, F., Ludueña-Almeida, F., & AlmirónI, W. (2012). New records of  
416 mosquito species (Diptera: Culicidae) from Neuquén and La Rioja provinces,  
417 Argentina. *Revista de Saude Publica*, 46(2), 387–389.  
418 <https://doi.org/10.1590/S0034-89102012005000007>
- 419 16. Hassan, A. N., Nogoumy, N. El, & Kassem, H. A. (2013). Characterization of  
420 landscape features associated with mosquito breeding in urban Cairo using  
421 remote sensing. *Egyptian Journal of Remote Sensing and Space Science*, 16(1),  
422 63–69. <https://doi.org/10.1016/j.ejrs.2012.12.002>
- 423 17. Heinisch, M. R. S., Diaz-Quijano, F. A., Chiaravalloti-Neto, F., Menezes  
424 Pancetti, F. G., Rocha Coelho, R., dos Santos Andrade, P., Urbinatti, P. R., de  
425 Almeida, R. M. M. S., & Lima-Camara, T. N. (2019). Seasonal and spatial  
426 distribution of *Aedes aegypti* and *Aedes albopictus* in a municipal urban park in  
427 São Paulo, SP, Brazil. *Acta Tropica*, 189, 104–113.  
428 <https://doi.org/10.1016/j.actatropica.2018.09.011>
- 429 18. Higa, Y. (2011). Dengue vectors and their spatial distribution. *Tropical*  
430 *Medicine and Health*, 39(4), 17–27. <https://doi.org/10.2149/tmh.2011-S04>
- 431 19. Jackson, T. J., Chen, D., Cosh, M., Li, F., Anderson, M., Walthall, C.,  
432 Doriaswamy, P., & Hunt, E. R. (2004). Vegetation water content mapping using  
433 Landsat data derived normalized difference water index for corn and soybeans.  
434 *Remote Sensing of Environment*, 92(4), 475–482.  
435 <https://doi.org/10.1016/j.rse.2003.10.021>
- 436 20. Juliano, S. A., & Lounibos, L. P. (2005). Ecology of invasive mosquitoes:  
437 Effects on resident species and on human health. *Ecology Letters*, 8(5), 558–  
438 574. <https://doi.org/10.1111/j.1461-0248.2005.00755.x>
- 439 21. Kache, P. A., Eastwood, G., Collins-Palmer, K., Katz, M., Falco, R. C., Bajwa,  
440 W. I., Armstrong, P. M., Andreadis, T. G., & Diuk-Wasser, M. A. (2020).  
441 Environmental determinants of *aedes albopictus* abundance at a northern limit of  
442 its range in the United States. *American Journal of Tropical Medicine and*  
443 *Hygiene*, 102(2), 436–447. <https://doi.org/10.4269/ajtmh.19-0244>

- 444 22. Lima-Camara, T. N. De, Honório, N. A., & Lourenço-de-Oliveira, R. (2006).  
445 Frequência e distribuição espacial de *Aedes aegypti* e *Aedes albopictus* (Diptera,  
446 Culicidae) no Rio de Janeiro, Brasil. *Cadernos de Saúde Pública*, 22(10), 2079–  
447 2084.
- 448 23. Little, E., Barrera, R., Seto, K. C., & Diuk-Wasser, M. (2011). Co-occurrence  
449 patterns of the dengue vector *Aedes aegypti* and *Aedes mediovittatus*, a dengue  
450 competent mosquito in Puerto Rico. *EcoHealth*, 8(3), 365–375.  
451 <https://doi.org/10.1007/s10393-011-0708-8>
- 452 24. Lizuain, A. A., Leporace, M., Santini, M. S., Utgés, M. E., & Schweigmann, N.  
453 (2019). Update on the distribution of *Aedes albopictus* (Diptera: Culicidae) in  
454 Misiones, Argentina. *Revista Do Instituto de Medicina Tropical de Sao Paulo*,  
455 61(January), 1–6. <https://doi.org/10.1590/s1678-9946201961046>
- 456 25. Lorenz, C., Chiaravalloti-Neto, F., de Oliveira Lage, M., Quintanilha, J. A.,  
457 Parra, M. C., Dibo, M. R., Fávaro, E. A., Guirado, M. M., & Nogueira, M. L.  
458 (2020). Remote sensing for risk mapping of *Aedes aegypti* infestations: Is this a  
459 practical task? *Acta Tropica*, 205, 105398.  
460 <https://doi.org/10.1016/j.actatropica.2020.105398>
- 461 26. Manica, M., Filipponi, F., D'Alessandro, A., Screti, A., Neteler, M., Rosà, R.,  
462 Solimini, A., della Torre, A., & Caputo, B. (2016). Spatial and Temporal Hot  
463 Spots of *Aedes albopictus* Abundance inside and outside a South European  
464 Metropolitan Area. *PLoS Neglected Tropical Diseases*, 10(6), 1–17.  
465 <https://doi.org/10.1371/journal.pntd.0004758>
- 466 27. McFeeters, S. K. (1996). The use of the Normalized Difference Water Index  
467 (NDWI) in the delineation of open water features. *International Journal of*  
468 *Remote Sensing*, 17(7), 1425–1432.  
469 <https://doi.org/10.1080/01431169608948714>
- 470 28. Montagner, F. R. G., Silva, O. S., & Jahnke, S. M. (2018). Mosquito species  
471 occurrence in association with landscape composition in green urban areas.  
472 *Brazilian Journal of Biology*, 78(2), 233–239. [https://doi.org/10.1590/1519-](https://doi.org/10.1590/1519-6984.04416)  
473 [6984.04416](https://doi.org/10.1590/1519-6984.04416)
- 474 29. Mudele, O., Frery, A. C., Zanandrez, L. F. R., Eiras, A. E., & Gamba, P. (2021).  
475 Modeling dengue vector population with earth observation data and a  
476 generalized linear model. *Acta Tropica*, 215(December 2019), 105809.  
477 <https://doi.org/10.1016/j.actatropica.2020.105809>

- 478 30. Mudele, O., & Gamba, P. (2019). Mapping vegetation in urban areas using  
479 Sentinel-2. *2019 Joint Urban Remote Sensing Event, JURSE 2019*, 1–4.  
480 <https://doi.org/10.1109/JURSE.2019.8809019>
- 481 31. Myer, M. H., Fizer, C. M., Mcpherson, K. R., Neale, A. C., Pilant, A. N.,  
482 Rodriguez, A., Whung, P. Y., & Johnston, J. M. (2020). Mapping *Aedes aegypti*  
483 (Diptera: Culicidae) and *Aedes albopictus* Vector Mosquito Distribution in  
484 Brownsville, TX. *Journal of medical entomology*, *57*(1), 231–240.  
485 <https://doi.org/10.1093/jme/tjz132>
- 486 32. Oyarzabal, M., Clavijo, J., Oakley, L., Biganzoli, F., Tognetti, P., Barberis, I., &  
487 Oesterhel, M., (2018). Vegetation units of Argentina. *Ecología Austral*, *28* (01),  
488 040–063.
- 489 33. Páez, C., Rubén, E., Páez, M. A. C., & Murúa, A. F. (2016). Primer registro de  
490 *Aedes aegypti* (Diptera: Culicidae) en San Juan, Argentina. *Revista de La*  
491 *Sociedad Entomológica Argentina*, *75*(1–2), 93–95. [https://doi.org/10.1371/jour-](https://doi.org/10.1371/journal.pntd.0001963)  
492 [nal.pntd.0001963](https://doi.org/10.1371/journal.pntd.0001963)
- 493 34. Pope, K. O., Rejmankova, E., Savage, H. M., Arredondo-Jimenez, J. I.,  
494 Rodriguez, M. H., & Roberts, D. R. (1994). Remote sensing of tropical wetlands  
495 for malaria control in Chiapas, Mexico. *Ecological Applications*, *4*(1), 81–90.  
496 <https://doi.org/10.2307/1942117>
- 497 35. Ranagalage, M., Estoque, R.C., & Murayama, Y. (2017). An Urban Heat Island  
498 Study of the Colombo Metropolitan Area, Sri Lanka, Based on Landsat Data  
499 (1997–2017). *ISPRS International Journal of Geo-Information*, *6*(7), 189.  
500 <https://doi.org/10.3390/ijgi6070189>
- 501 36. Rossi, G. C. (2015). Annotated checklist, distribution, and taxonomic  
502 bibliography of the mosquitoes (Insecta: Diptera: Culicidae) of Argentina.  
503 *Check List*, *11*(4). <https://doi.org/10.15560/11.4.1712>
- 504 37. Rossi, G. C., Pascual, N. T., & Krsticevic, F. J. (1999). Scientific First Record.  
505 *Journal of the American Mosquito Control Association*, *15*(3), 422.
- 506 38. Rúa-Urbe, G. L., Suárez-Acosta, C., & Rojo, R. A. (2012). Implicaciones  
507 epidemiológicas de *Aedes*. *Revista Facultad Nacional de Salud Pública*, *30*(3),  
508 328–337.
- 509 39. Sallam, M. F., Fizer, C., Pilant, A. N., & Whung, P. Y. (2017). Systematic  
510 review: Land cover, meteorological, and socioeconomic determinants of aedes  
511 mosquito habitat for risk mapping. *International Journal of Environmental*

- 512            *Research and Public Health*, 14(10). <https://doi.org/10.3390/ijerph14101230>
- 513            40. Samson, D. M., Archer, R. S., Alimi, T. O., Arheart, K. L., Impoinvil, D. E.,  
514            Oscar, R., Fuller, D. O., & Qualls, W. A. (2015) New baseline environmental  
515            assessment of mosquito ecology in northern Haiti during increased urbanization.  
516            *Journal of Vector Ecology*, 40(1), 46-58. doi: 10.1111/jvec.12131.
- 517            41. Schweigmann, N., Vezzani, D., Orellano, P., Kuruc, J., & Boffi, R. (2004).  
518            *Aedes albopictus* in an area of Misiones, Argentina. *Revista de Saude Publica*,  
519            38(1), 136–138. <https://doi.org/10.1590/S0034-89102004000100020>
- 520            42. Silva, F., Eibl, B.I., & Bobadilla, E.A. (2008). Climatic characteristics of  
521            Eldorado, Misiones Argentina. Acta nro 13 Jornadas JOTEFA. 583–629 access:  
522            <https://www.jotefa.com/actas#portada>.
- 523            43. Troyo, A., Fuller, D. O., Calderón-Arguedas, O., Solano, M. E., & Beier, J. C.  
524            (2009). Urban structure and dengue incidence in Puntarenas, Costa Rica.  
525            *Singapore Journal of Tropical Geography*, 30(2), 265–282.  
526            <https://doi.org/10.1111/j.1467-9493.2009.00367.x>
- 527            44. Vanwambeke, S. O., Somboon, P., Harbach, R. E., Isenstadt, M., Lambin, E. F.,  
528            Walton, C., & Butlin, R. K. (2007). Landscape and land cover factors influence  
529            the presence of *Aedes* and *Anopheles* larvae. *Journal of Medical Entomology*,  
530            44(1), 133–144. [https://doi.org/10.1603/0022-  
531            2585\(2007\)44\[133:LALCFI\]2.0.CO;2](https://doi.org/10.1603/0022-2585(2007)44[133:LALCFI]2.0.CO;2)
- 532            45. Vezzani, D., & Carbajo, A. E. (2008). *Aedes aegypti*, *Aedes albopictus*, and  
533            dengue in Argentina: Current knowledge and future directions. *Memorias Do  
534            Instituto Oswaldo Cruz*, 103(1), 66–74. [https://doi.org/10.1590/S0074-  
535            02762008005000003](https://doi.org/10.1590/S0074-02762008005000003)
- 536            46. Xu, H. (2006). Modification of normalised difference water index (NDWI) to  
537            enhance open water features in remotely sensed imagery. *International Journal  
538            of Remote Sensing*, 27(14), 3025–3033.  
539            <https://doi.org/10.1080/01431160600589179>
- 540            47. Zha, Y., Gao, J., & Ni, S. (2003). Use of normalized difference built-up index in  
541            automatically mapping urban areas from TM imagery. *International Journal of  
542            Remote Sensing*, 24(3), 583-594, doi: 10.1080/01431160304987
- 543            48. Zuur, A. F., Ieno, E. N., Walker, N., Saveliev, A. A., & Smith, G. M. (2009).  
544            *Mixed effects models and extensions in ecology with R*. Springer New York.  
545            <https://doi.org/10.1007/978-0-387-87458-6>

- 546 49. Zuur, A. F., Ieno, E. N., & Elphick, C. S. (2010). A protocol for data exploration  
547 to avoid common statistical problems. *Methods in Ecology and Evolution*, 1(1),  
548 3-14. <https://doi.org/10.1111/j.2041-210X.2009.00001.x>
